# Supplementary material for: Influence of phenolphthalein groups on the structure and properties of poly(arylene ether sulfone nitrile)-based anion exchange membranes for fuel cells
Source: Royal Society of Chemistry journal article supplement (doi:10.1039/c5ra16946a), 2015-01-01
Supplement: c5ra16946a1.pdf [file c5ra16946a1.pdf]

## Supporting Information

### Influence of phenolphthalein groups on the structure and properties of poly(arylene ether sulfone nitrile)s-based anion exchange membranes for fuel cells

Ao Nan Lai, Yi Zhi Zhuo, Chen Xiao Lin, Qiu Gen Zhang, Ai Mei Zhu, Mei Ling Ye, Qing Lin Liu\*

*Department of Chemical & Biochemical Engineering, Fujian Provincial Key Laboratory of Theoretical and Computational Chemistry, The College of Chemistry and Chemical Engineering, Xiamen University, Xiamen 361005, P. R. China*

\*Corresponding author:

E-mail: [qlliu@xmu.edu.cn](mailto:qlliu@xmu.edu.cn) (Liu QL), tel: 86-592-2188072, fax: 86-592-2184822

Fig. S1  $^1\text{H}$  NMR spectra of (a) oligomer-PF ( $m=19$ ), (b) oligomer-IF ( $m=17$ ), and (c) oligomer-OH ( $n=22$ ).

Fig. S2  $^1\text{H}$  NMR spectra of (a) MPESN and (b) MPESN.

Fig. S3  $^1\text{H}$  NMR spectra of (a) BrPPESN-2.87 and (b) BrPESN-2.92.

Fig. S4  $^1\text{H}$  NMR spectra of BrPPESN- $x$  prepared with various molar ratios of NBS to MPESN: (a)

DF=0.94 ( $n(\text{NBS})/n(-\text{CH}_3)=0.35$ ); (b) DF=1.91 ( $n(\text{NBS})/n(-\text{CH}_3)=0.7$ ); (c) DF=2.87 ( $n(\text{NBS})/n(-\text{CH}_3)=1.0$ ); (d) DF=3.36 ( $n(\text{NBS})/n(-\text{CH}_3)=2.0$ ).

Fig. S5  $^1\text{H}$  NMR spectra of (a) ImPPESN-2.87 and (b) ImPESN-2.92.

Fig. S6 FT-IR spectra of ImPPESN-2.87 (a) before and (b) after the alkaline stability test, and of

ImPESN-2.92 (c) before and (d) after the alkaline stability test.

Fig. S7  $^1\text{H}$  NMR spectra of ImPPESN-2.87 (a) before and (b) after the alkaline stability test.

Fig. S8  $^1\text{H}$  NMR spectra of ImPESN-2.92 (a) before and (b) after the alkaline stability test.

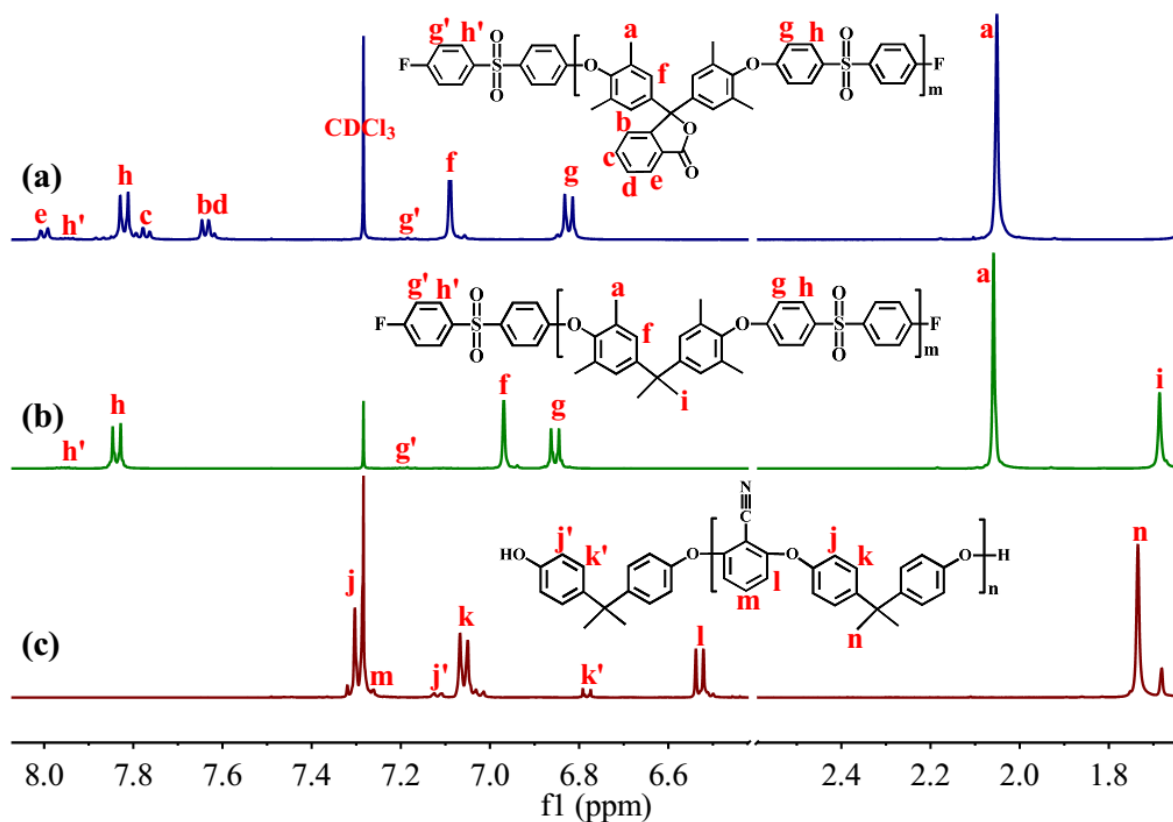

Fig. S1  $^1\text{H}$  NMR spectra of (a) oligomer-PF ( $m=19$ ),<sup>1</sup> (b) oligomer-IF ( $m=17$ ), and (c) oligomer-OH ( $n=22$ )<sup>1</sup>.

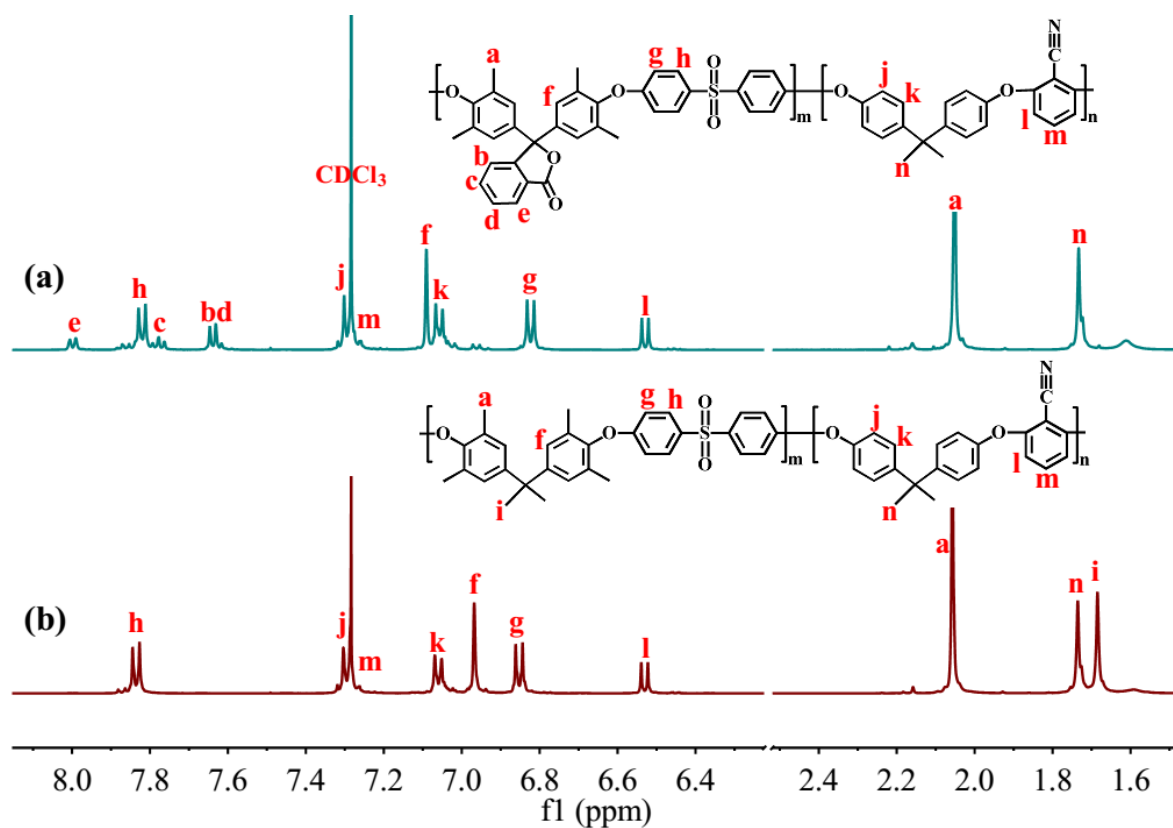

Fig. S2  $^1\text{H}$  NMR spectra of (a) MPESN<sup>1</sup> and (b) MPESN.

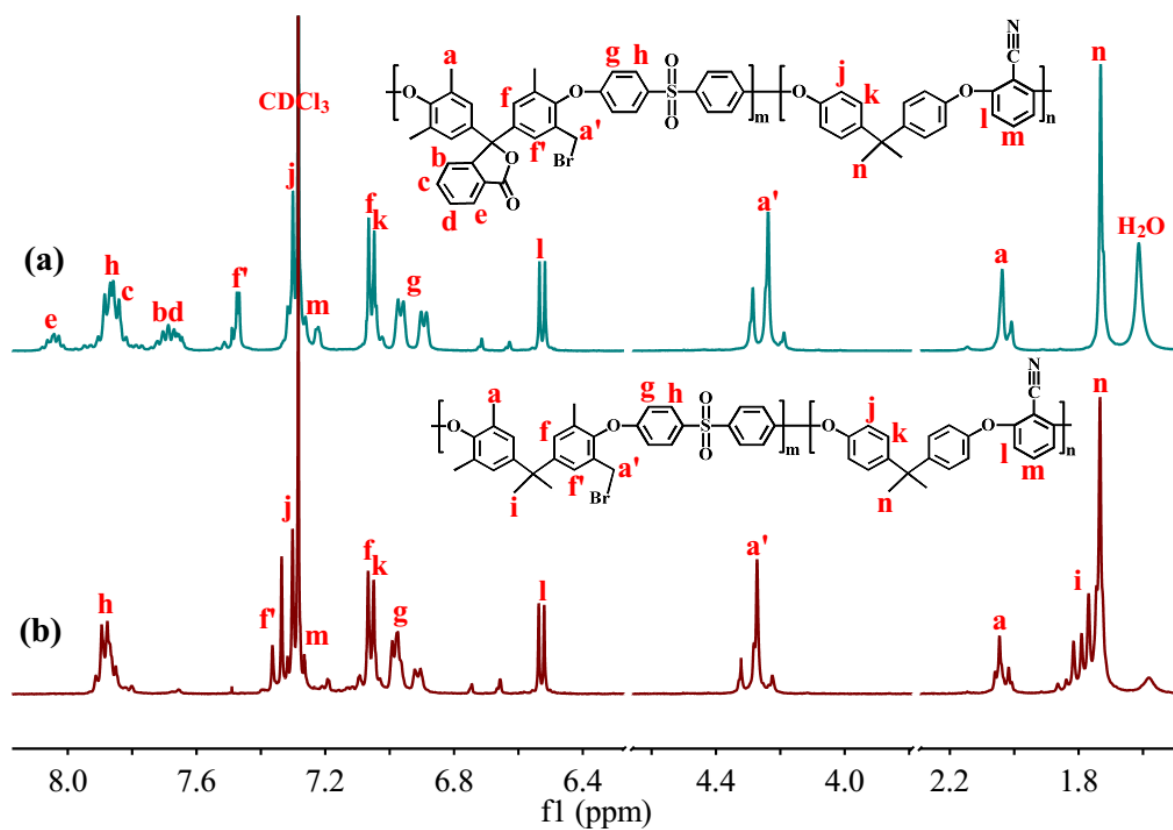

Fig. S3  $^1\text{H}$  NMR spectra of (a) BrPPESN-2.87<sup>1</sup> and (b) BrPESN-2.92.

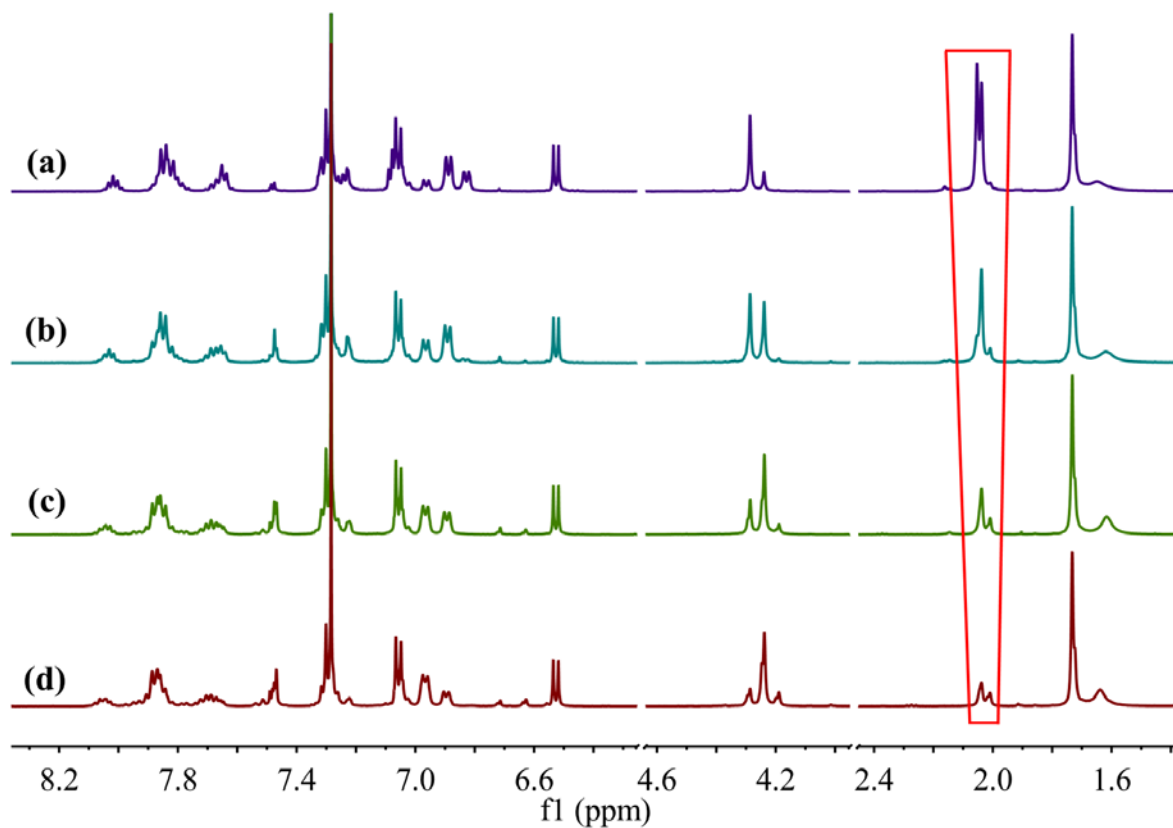

Fig. S4  $^1\text{H}$  NMR spectra of BrPPESN-x prepared with various molar ratios of NBS to MPESN: (a) DF=0.94 ( $n(\text{NBS})/n(-\text{CH}_3)=0.35$ ); (b) DF=1.91 ( $n(\text{NBS})/n(-\text{CH}_3)=0.7$ ); (c) DF=2.87 ( $n(\text{NBS})/n(-\text{CH}_3)=1.0$ );  
<sup>1</sup> (d) DF=3.36 ( $n(\text{NBS})/n(-\text{CH}_3)=2.0$ ).

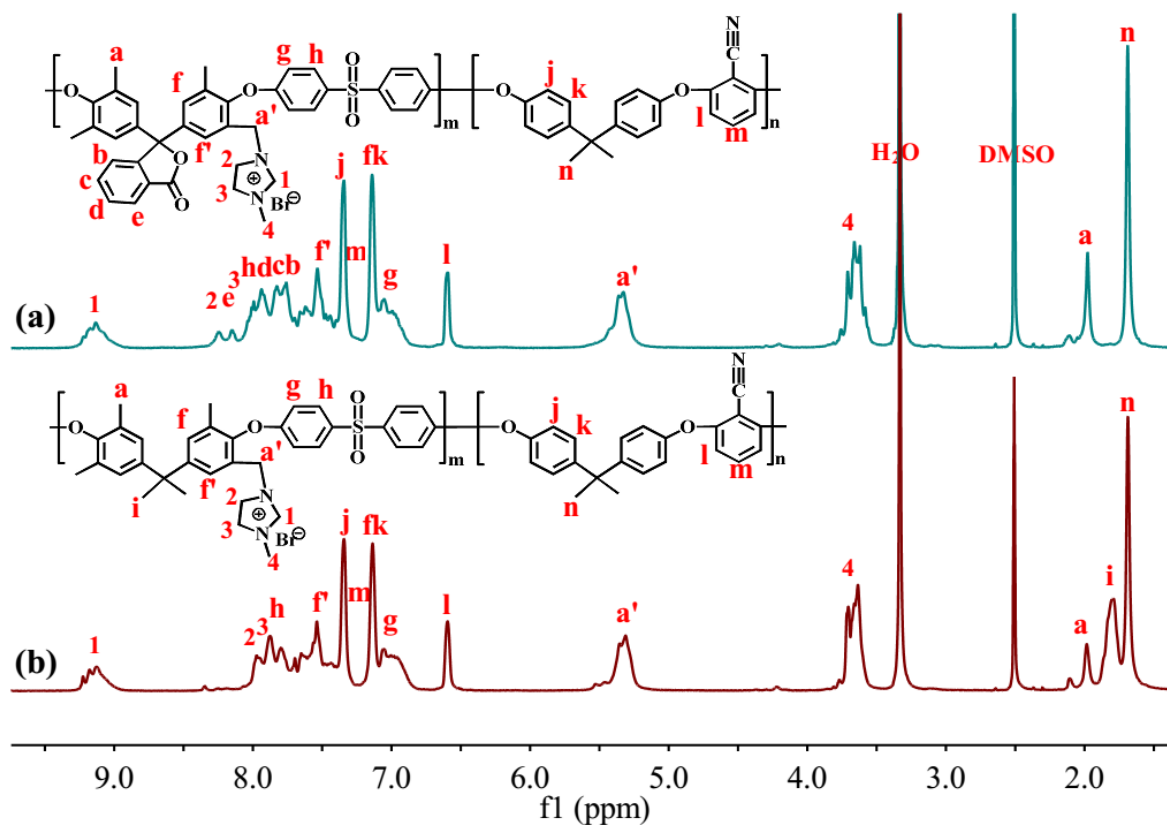

Fig. S5  $^1\text{H}$  NMR spectra of (a) ImPPESN-2.87<sup>1</sup> and (b) ImPESN-2.92.

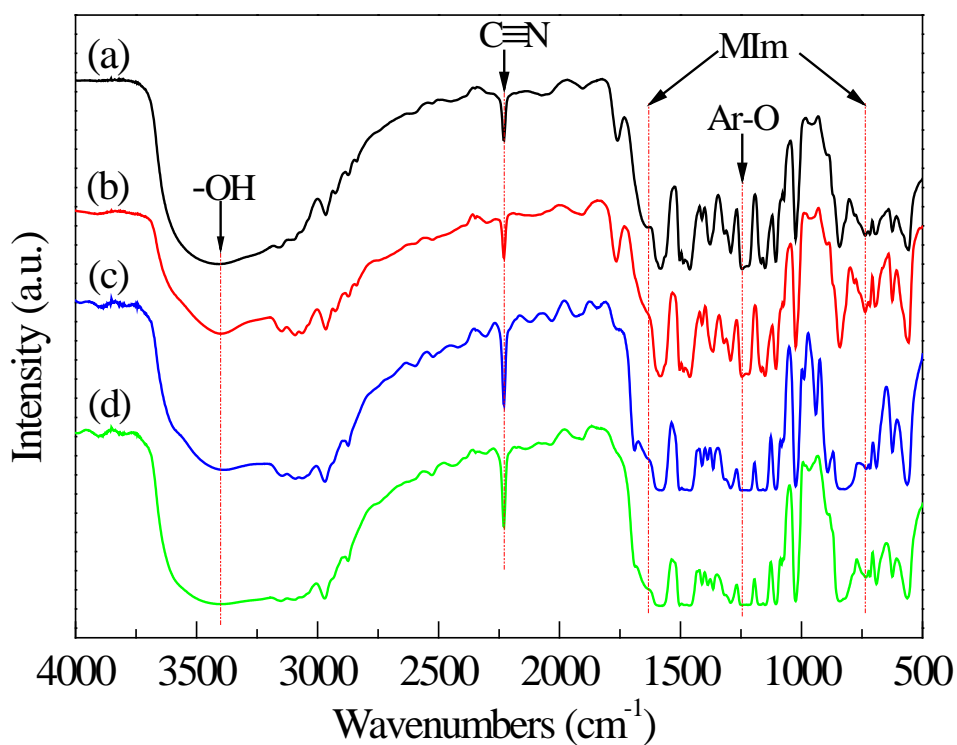

Fig. S6 FT-IR spectra of ImPPESN-2.87<sup>1</sup> (a) before and (b) after the alkaline stability test and of ImPESN-2.92 (c) before and (d) after the alkaline stability test.

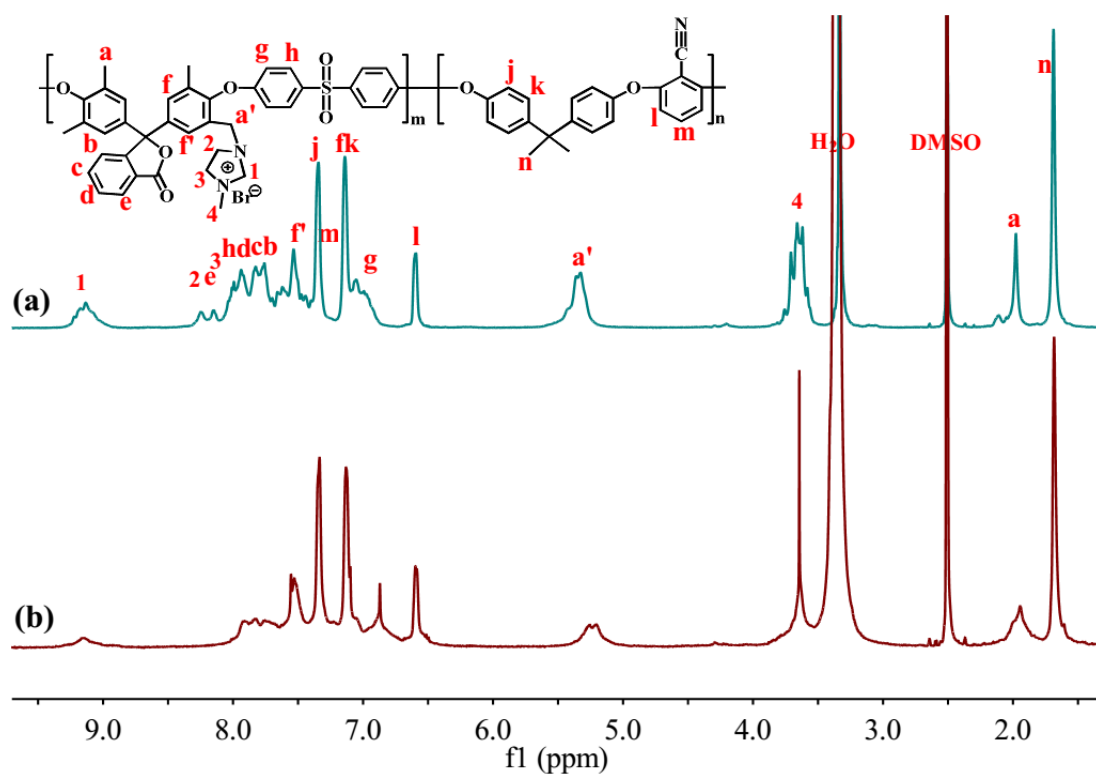

**Fig. S7**  $^1\text{H}$  NMR spectra of ImpPESN-2.87 <sup>1</sup> (a) before and (b) after the alkaline stability test.

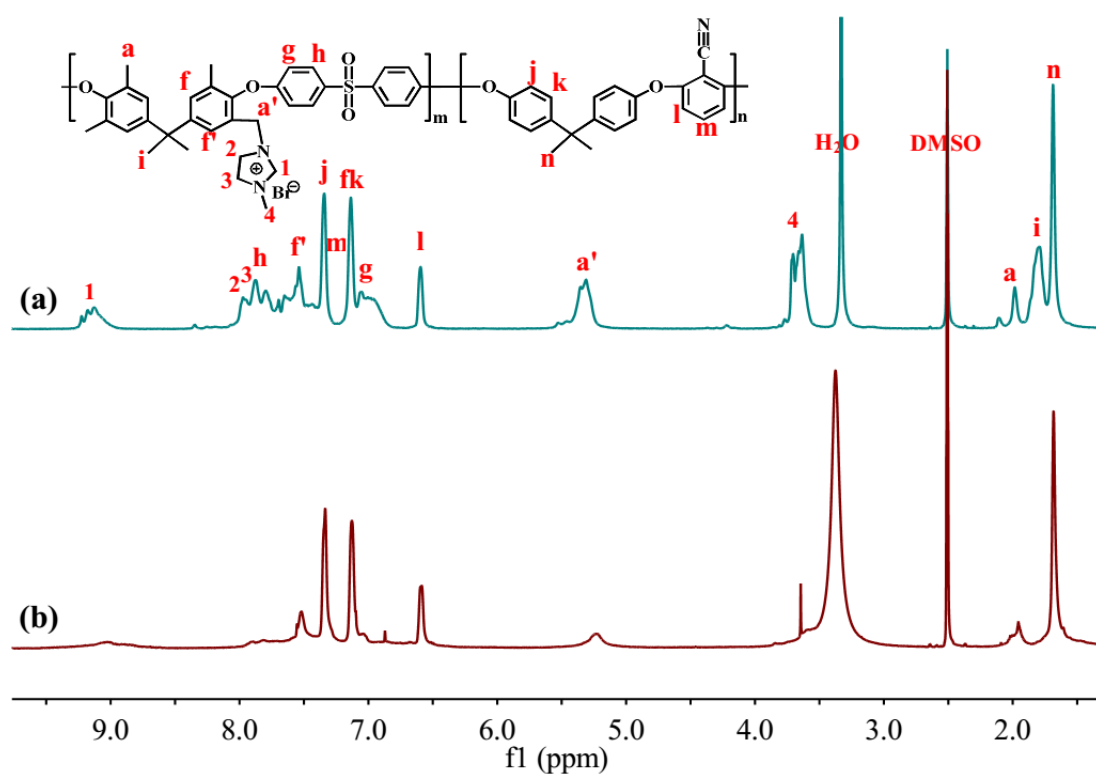

**Fig. S8**  $^1\text{H}$  NMR spectra of ImpPESN-2.92 (a) before and (b) after the alkaline stability test.

#### References:

- 1 A. N. Lai, L. S. Wang, C. X. Lin, Y. Z. Zhuo, Q. G. Zhang, A. M. Zhu and Q. L. Liu, *ACS Appl. Mater. Interfaces*, 2015, **7**, 8284–8292.
